# Supplementary material for: Investigation of the one-step electrochemical deposition of graphene oxide-doped poly(3,4-ethylenedioxythiophene)–polyphenol oxidase as a dopamine sensor
Source: Royal Society of Chemistry journal article supplement (doi:10.1039/d2ra00791f), 2022-01-01
Supplement: d2ra00791f1.pdf [file d2ra00791f1.pdf]

**Investigation of one-step electrochemical deposition of graphene oxide doped poly (3, 4-ethylenedioxythiophene)-polyphenol oxidase for dopamine sensor**

P.Ramu<sup>1</sup>, S.P. Vimal<sup>2</sup>, P. Suresh<sup>3</sup>, S. Anandhavelu<sup>4</sup>, U. Saravanakumar<sup>5</sup>, Raju Suresh Kumar<sup>6</sup>, Abdul I. Alamsour<sup>6</sup>, Natarajan Arumugam<sup>6</sup>

<sup>1,2</sup> Electronics and Communication Engineering, Jaya Institute of Technology, Tamilnadu, India.

<sup>2</sup> Electronics and Communication Engineering, Sri Ramakrishna Engineering College, Coimbatore, India.

<sup>3</sup> Dept of ECE, Vel Tech Rangarajan Dr Sagunthala R & D Institute of Science and Technology, Chennai, Tamilnadu - 600062. India.

<sup>4</sup> Dept. of Applied Chemistry, Sri Vanketeswara College of Engineering, Pennalur, Sriperambudur-602117, Chennai, India

<sup>5</sup> Dept of ECE, Muthayammal Engineering College, Rasipuram, Tamilnadu. India

<sup>6</sup> Dept. of Chemistry, College of Science, King Saud University, Riyadh-11451, Saudi Arabia

Equations used in this work

Laviron's equation

$$I_p = nFQu/4RT \text{ ----- (1)}$$

$$I_p = 2.69 * 10^5 n^{3/2} A D^{1/2} C u^{1/2} \text{ ----- (2)}$$

$$\log k_s = \alpha \log (1-\alpha) + (1-\alpha) \log \alpha - \log (RT/nFv) - \{(1-\alpha) \alpha nF\Delta E/2.3RT\}^{15} \text{ --(3)}$$

Michealis-Menten equation

$$V_0 = \frac{V_{\max} [S]}{(K_M + [S])} \text{ -----(4)}$$

Arrhenius equation

$$\ln k = \ln A - \frac{Ea}{RT} \text{ -----(5)}$$

Table ST1. Determination of dopamine present in human urine.

| S.No. | Sample      | Dopamine Spiked [M] | Dopamine found [M]    | Recovery (%) | Dopamine found by HPLC [M] | Recovery (%) |
|-------|-------------|---------------------|-----------------------|--------------|----------------------------|--------------|
| 1.    | Human urine | $1 \times 10^{-6}$  | $0.99 \times 10^{-6}$ | 99           | $0.98 \times 10^{-6}$      | 98           |
|       |             | $1 \times 10^{-7}$  | $1.03 \times 10^{-7}$ | 103          | $1.02 \times 10^{-7}$      | 102          |
| 2.    | Human urine | $1 \times 10^{-6}$  | $0.99 \times 10^{-6}$ | 99           | $1.01 \times 10^{-6}$      | 101          |
|       |             | $1 \times 10^{-7}$  | $1.01 \times 10^{-7}$ | 101          | $1.03 \times 10^{-7}$      | 103          |
| 3.    | Human urine | $1 \times 10^{-6}$  | $1.01 \times 10^{-6}$ | 101          | $1.02 \times 10^{-6}$      | 102          |
|       |             | $1 \times 10^{-7}$  | $1.04 \times 10^{-7}$ | 104          | $1.05 \times 10^{-7}$      | 105          |
